# Supplementary material for: Npl4 decodes polyubiquitin length and gates D1-D2 coupling in human VCP/p97
Source: Research Square preprint supplement (doi:10.21203/rs.3.rs-9588629/v1), 2026-05-13
Supplement: Supplementary file [file 38598f79ed4c6c7d8b509b7a.pdf]

## *Supplementary Information*

# **Npl4 decodes polyubiquitin length and gates D1-D2 coupling in human VCP/p97**

**Laxmikanta Khamari<sup>1,4</sup>, Jingxuan Tang<sup>1,4</sup>, Stephanie L. Moon<sup>2,3</sup>, and Nils G. Walter<sup>1,2</sup>**

<sup>1</sup>Department of Chemistry, University of Michigan, Ann Arbor, MI 48109, USA. <sup>2</sup>Center for RNA Biomedicine, University of Michigan, Ann Arbor, MI, USA. <sup>3</sup>Department of Human Genetics, University of Michigan, Ann Arbor, MI 48109, USA. <sup>4</sup>These authors contributed equally: Laxmikanta Khamari, Jingxuan Tang. ✉e-mail: [nwalter@umich.edu](mailto:nwalter@umich.edu), [smslmoon@umich.edu](mailto:smslmoon@umich.edu)

## a Biotin and Cy3 Labeling with Ub<sup>1</sup>-S

### (i) Biotinylation Step

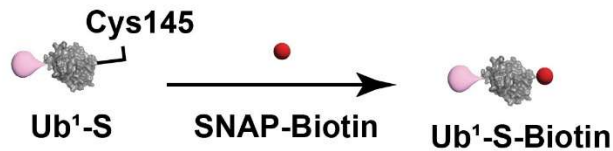

### (ii) Cy3 Labeling Step

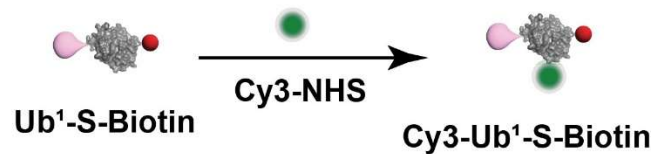

## b Ubiquitin Chain Length Extension of Cy3-Ub<sup>1</sup>-S-Biotin

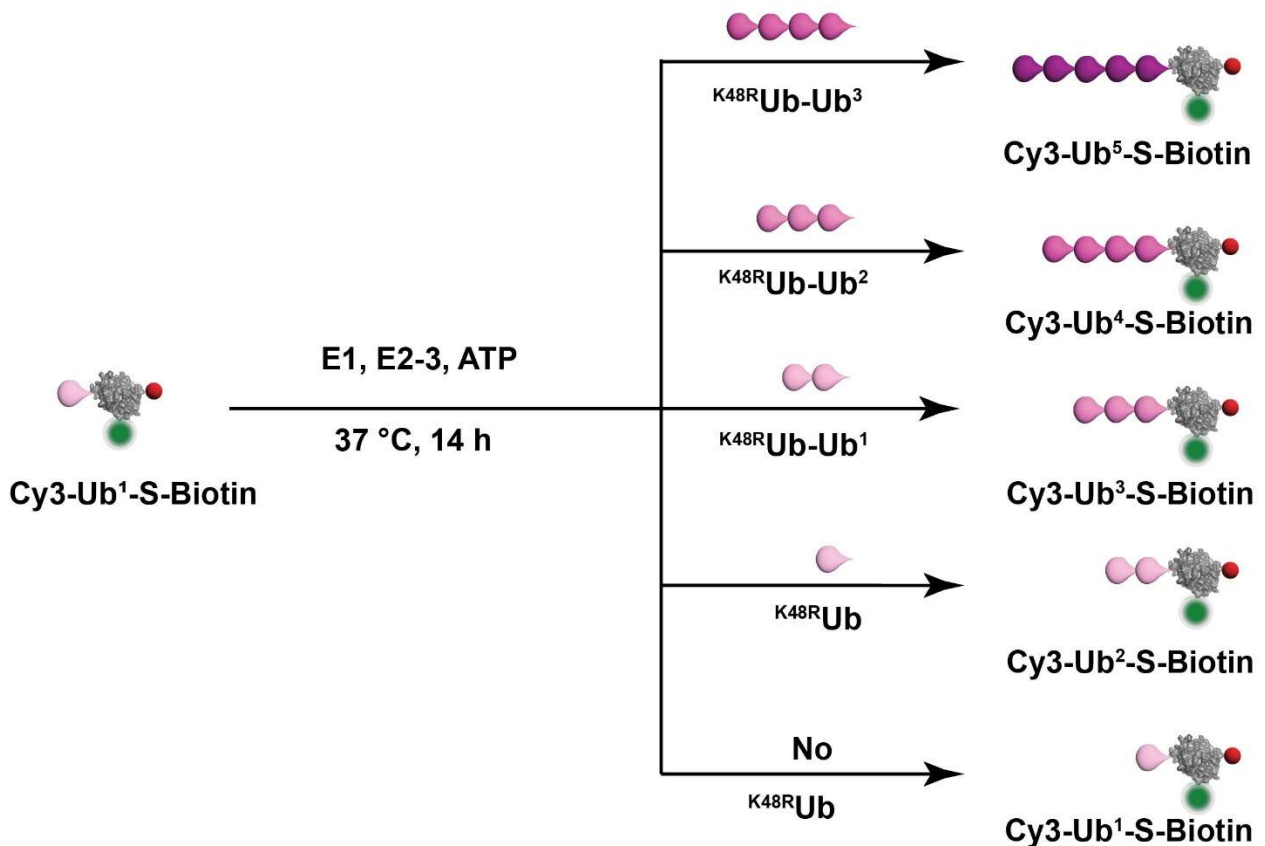

**Supplementary Fig. 1| Stepwise biotinylation, fluorescent labelling, and polyubiquitination workflow.** **a** Schematic overview of the sequential modification of Ub<sup>1</sup>-S, including (i) biotinylation for coverslip immobilization and (ii) Cy3 labeling for fluorescence imaging. **b** Workflow of the enzymatic polyubiquitination reaction used to generate ubiquitin substrates (here, SNAP-tag) of defined chain lengths for subsequent assays. Related to Figures 1 and 2.

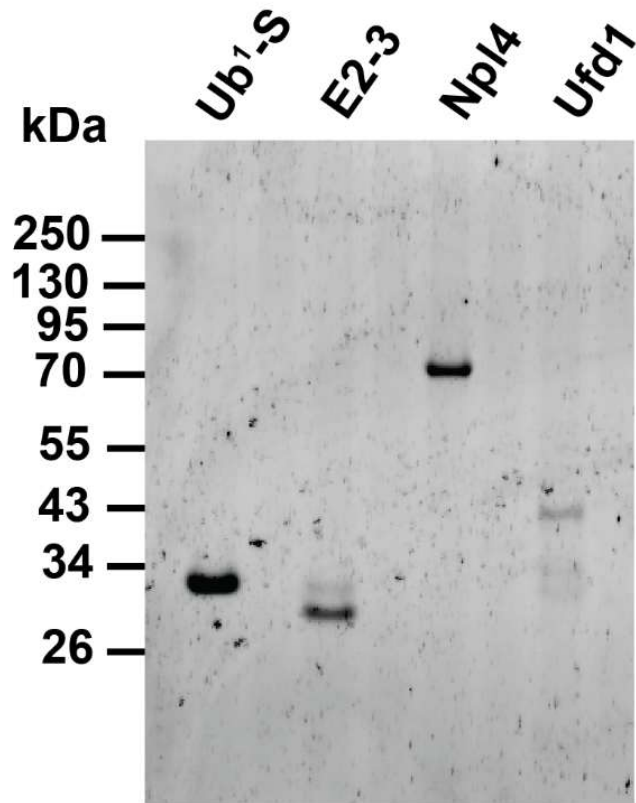

Supplementary Fig. 2| SDS-PAGE analysis of Ub<sup>1</sup>-S, E2-3, Npl4, and Ufd1 used in this study.

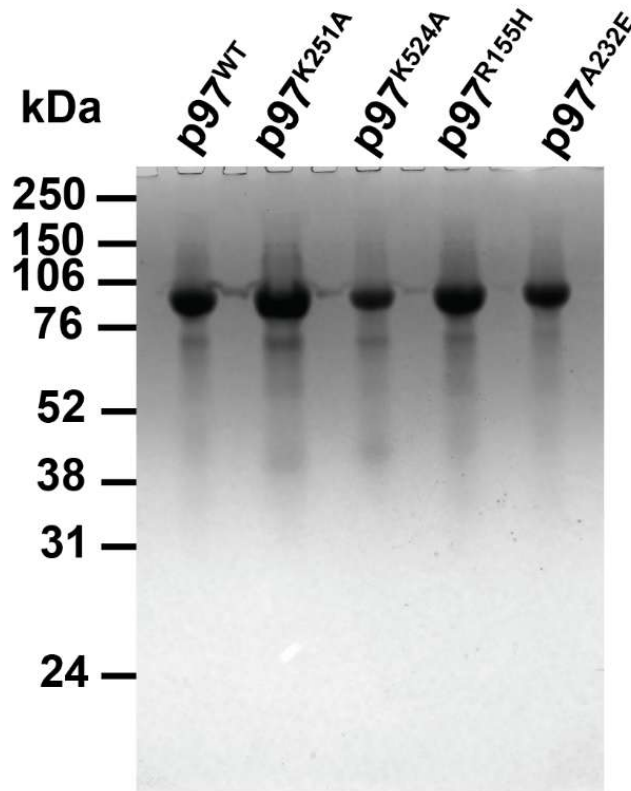

Supplementary Fig. 3| SDS-PAGE analysis of p97 variants used in this study.

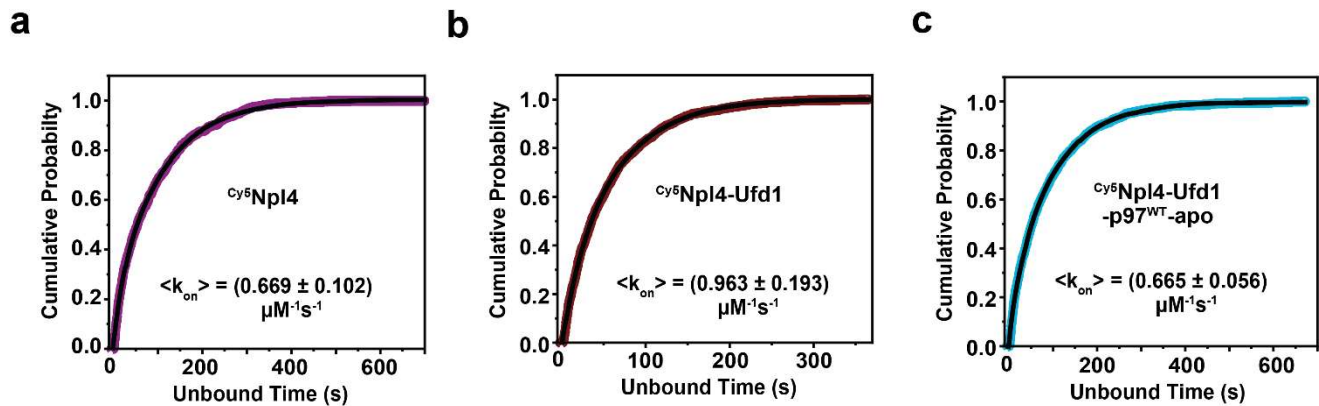

Supplementary Fig. 4| Binding kinetics of Npl4 to Ub<sup>5</sup>-S and modulation by Ufd1 and p97. a–c Cumulative distributions of unbound dwell times for Cy5-labeled Npl4 interacting with Ub<sup>5</sup>-S substrates under different conditions: (a) Npl4 alone, (b) in the formation of heterodimer with Ufd1, and (c) in association with the Ufd1–p97<sup>WT</sup> complex. Related to Figure 3

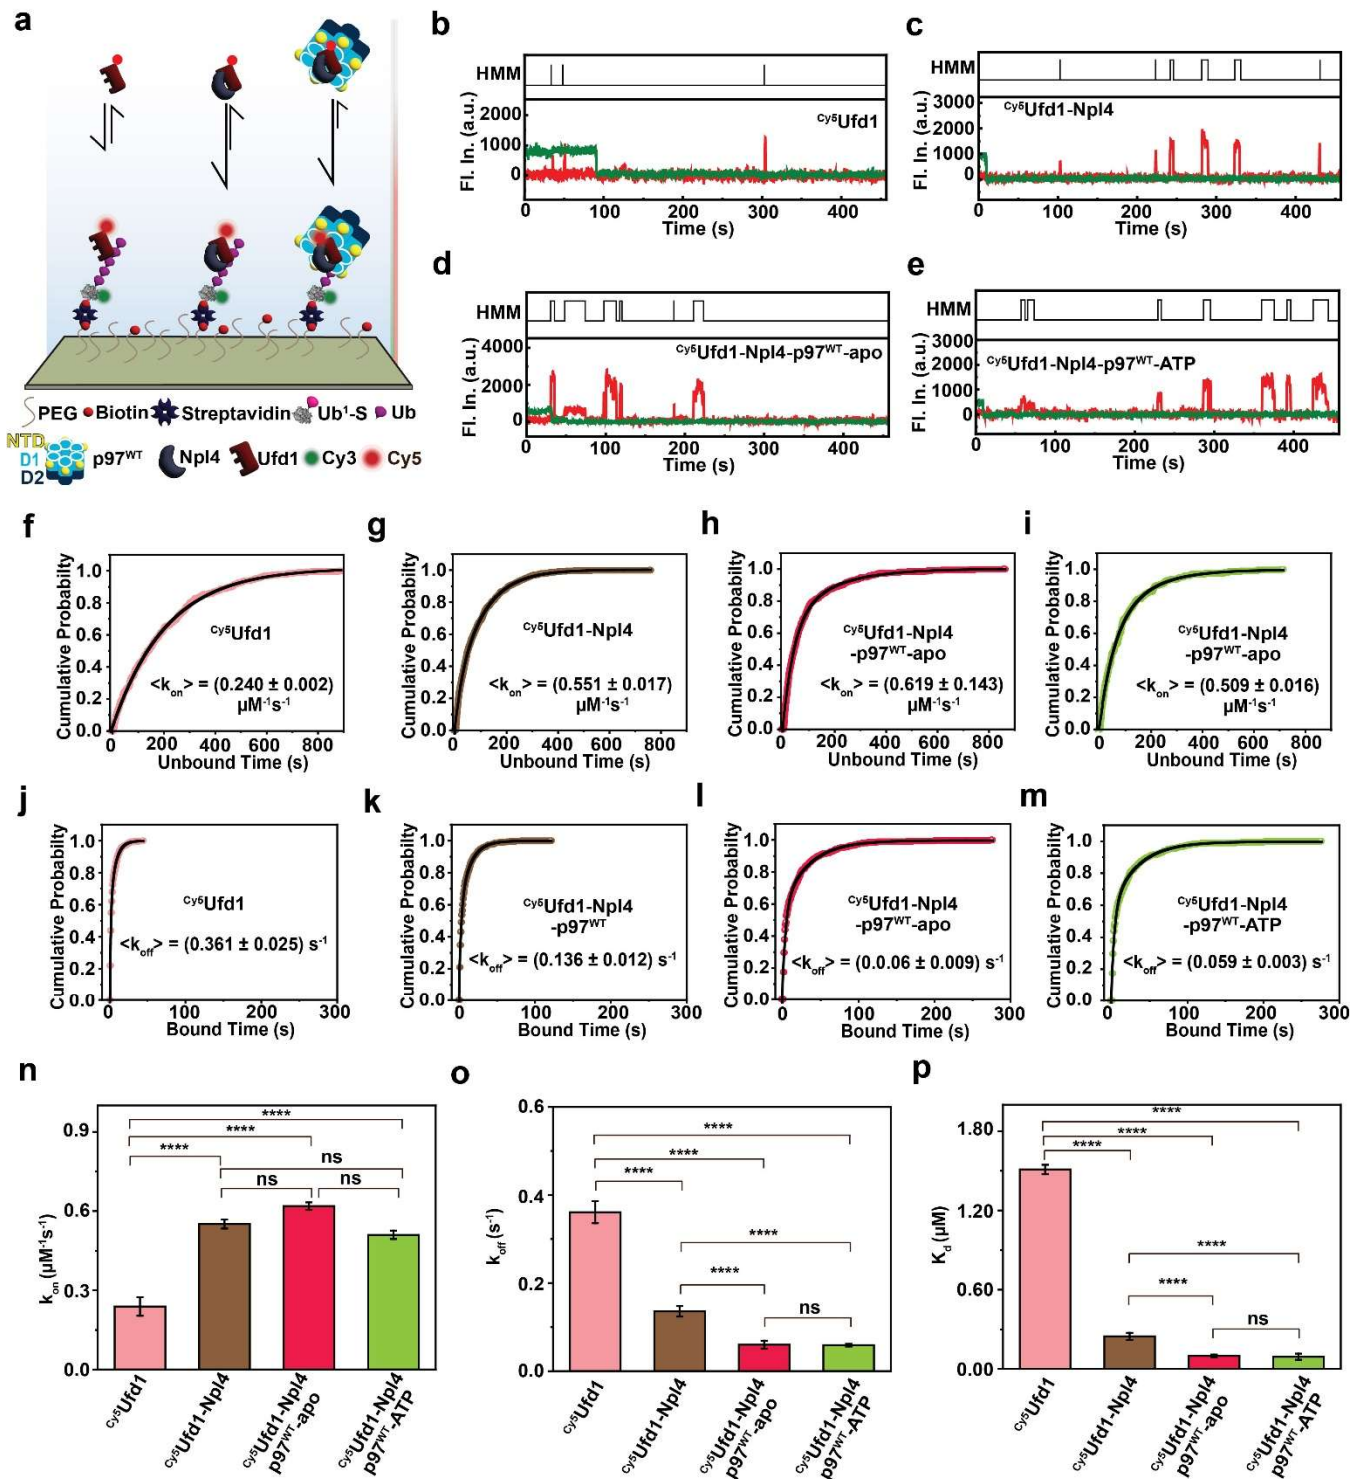

**Supplementary Fig. 5 | Binding dynamics of Ufd1 to Ub<sup>5</sup>-S substrate in the presence of Npl4 and p97<sup>WT</sup>.** **a** Schematic representation of the experimental workflow used to measure association and dissociation kinetics of Cy5-labelled Ufd1 (<sup>Cy5</sup>Ufd1) interacting with Ub<sup>5</sup>-S substrates under three conditions: Ufd1 alone, Ufd1 following Npl4 heterodimer formation, and the Npl4-p97<sup>WT</sup> complex. **b-e** Representative single-molecule fluorescence intensity time traces for <sup>Cy5</sup>Ufd1 binding to Ub<sup>5</sup>-S under four

conditions: Ufd1 alone (**b**), following assembly with Npl4 (**c**), association with the Npl4-p97<sup>WT</sup> complex in the absence of ATP (**d**), and after ATP addition (**e**). Segmentation via HMM analysis is indicated above each trace. **f-i** Cumulative distributions of unbound dwell times for <sup>Cy5</sup>Ufd1 on Ub<sup>5</sup>-S, contrasting conditions with or without Npl4 and the Npl4-p97<sup>WT</sup> complex, as shown. **j-m** Cumulative distributions of bound dwell times for <sup>Cy5</sup>Ufd1 on Ub<sup>5</sup>-S, similarly comparing the relevant conditions, as discussed earlier. **n-p** Quantification of kinetic parameters: association rate constant ( $k_{on}$ ), dissociation rate constant ( $k_{off}$ ), and equilibrium dissociation constant ( $K_d$ ) for <sup>Cy5</sup>Ufd1 binding to Ub<sup>5</sup>-S under each condition. Statistical significance was determined using a two-tailed Student's t-test (ns, not significant;  $0.05 < p \leq 0.5$ ;  $*0.01 < p \leq 0.05$ ;  $**0.001 < p \leq 0.01$ ;  $***0.0001 < p \leq 0.001$ ;  $****p \leq 0.0001$ ).

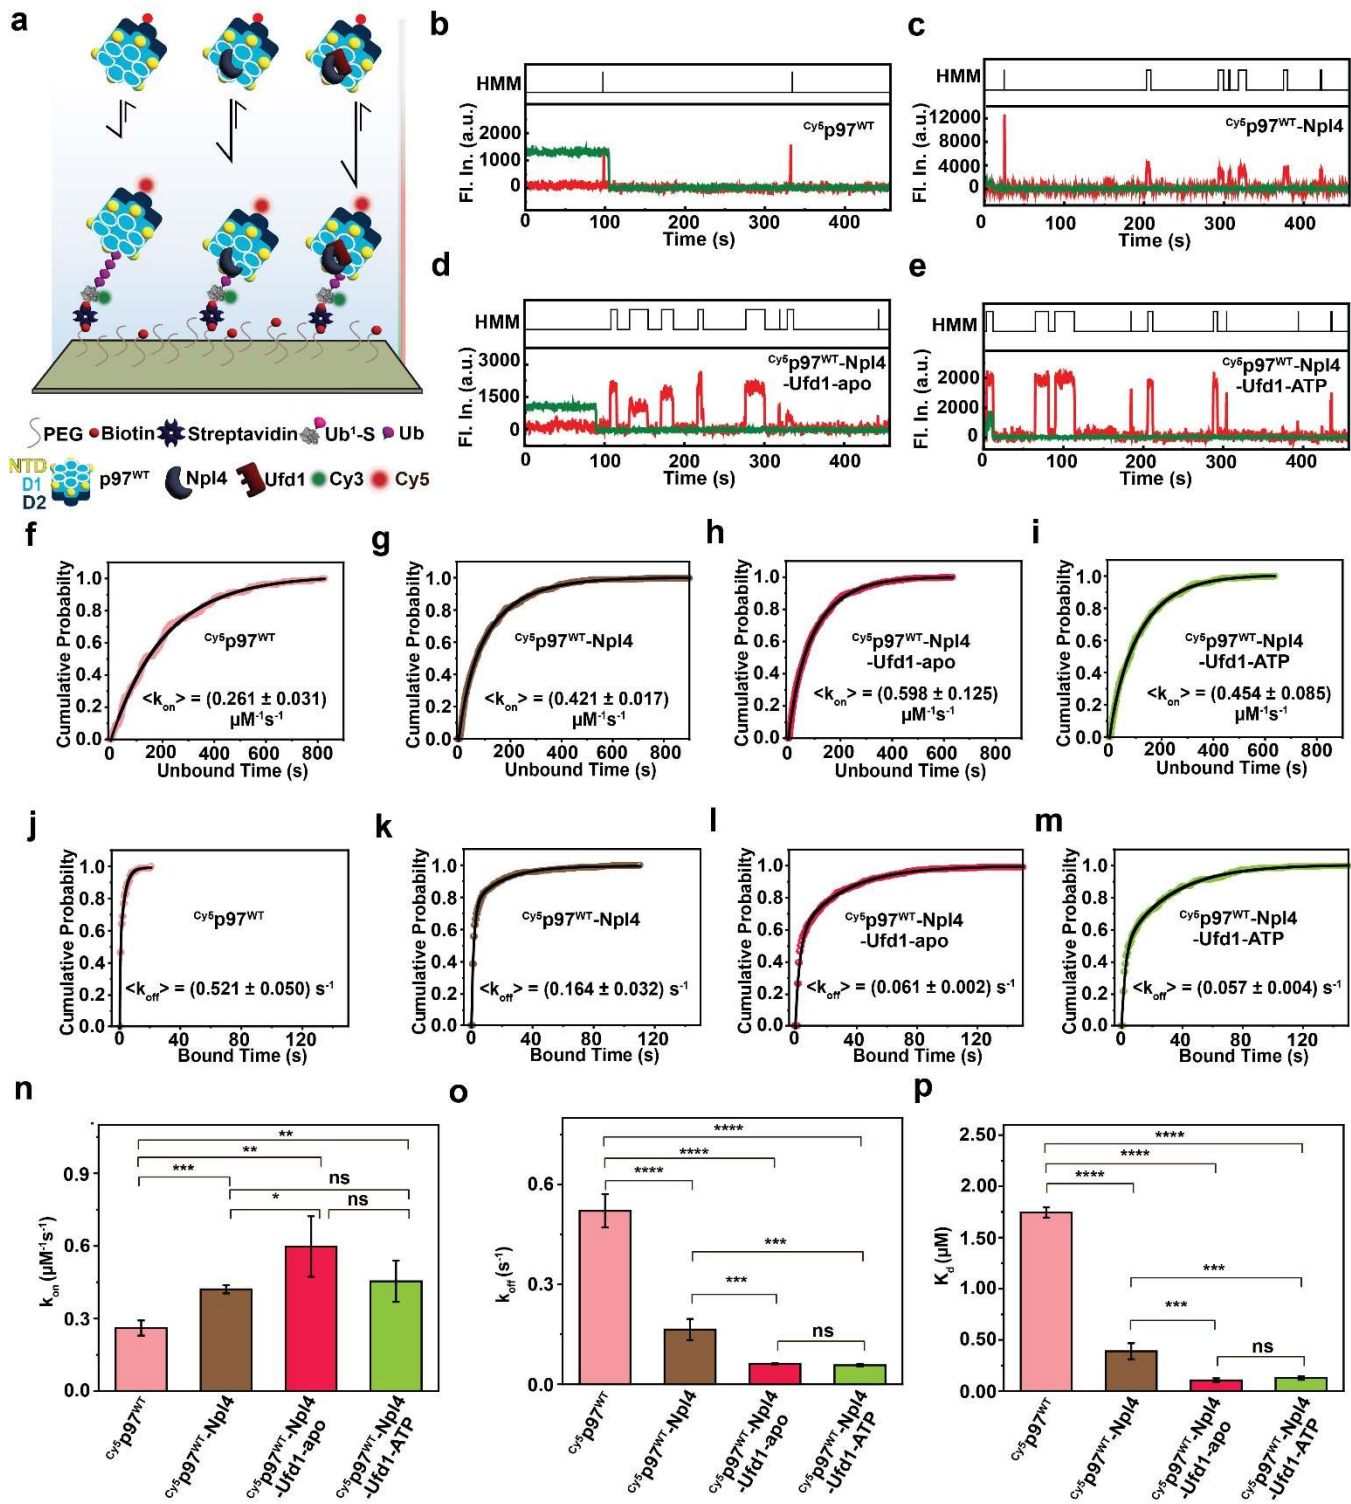

**Supplementary Fig. 6 | Binding dynamics of p97<sup>WT</sup> to Ub<sup>5</sup>-S substrate in the presence of Npl4 and Ufd1.** **a** Diagram outlining the experimental setup used to monitor association and dissociation kinetics of Cy5-labelled p97<sup>WT</sup> (Cy5p97) binding to Ub<sup>5</sup>-S substrates across three conditions: p97 alone, after incorporation with Npl4, and following assembly with the Npl4-Ufd1 complex. **b-e** Representative

single-molecule fluorescence intensity trajectories for <sup>Cy5</sup>p97 binding to Ub<sup>5</sup>-S under four scenarios: p97 alone (**b**), after addition of Npl4 (**c**), association with the Npl4–Ufd1 complex under apo conditions (**d**), and upon ATP addition (**e**). HMM-based segmentations are shown above each trace. **f–i** Cumulative distribution curves of unbound dwell times for <sup>Cy5</sup>p97 interacting with Ub<sup>5</sup>-S, comparing the presence and absence of Npl4 and the Npl4–Ufd1 complex. **j–m** Cumulative distributions of bound dwell times for <sup>Cy5</sup>p97 on Ub<sup>5</sup>-S, comparing the specified conditions. **n–p** Quantitative analysis of kinetic parameters including association rate constant ( $k_{on}$ ), dissociation rate constant ( $k_{off}$ ), and equilibrium dissociation constant ( $K_d$ ) for <sup>Cy5</sup>p97 binding to Ub<sup>5</sup>-S in each experimental condition. Statistical significance was determined using a two-tailed Student’s t-test (ns, not significant;  $0.05 < p \leq 0.5$ ;  $*0.01 < p \leq 0.05$ ;  $**0.001 < p \leq 0.01$ ;  $***0.0001 < p \leq 0.001$ ;  $****p \leq 0.0001$ ).

**a**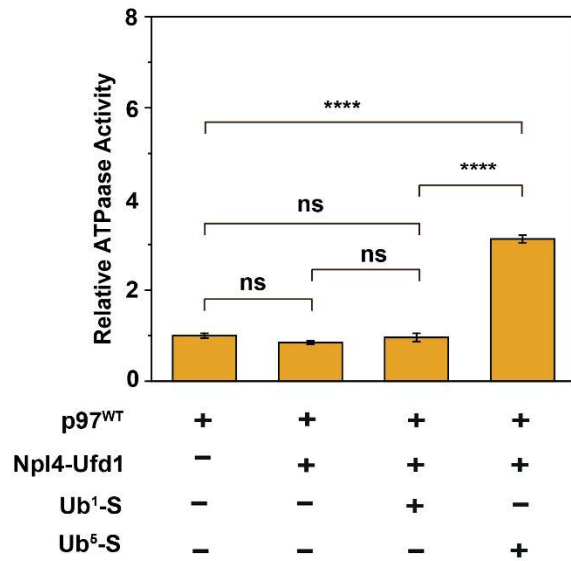**b**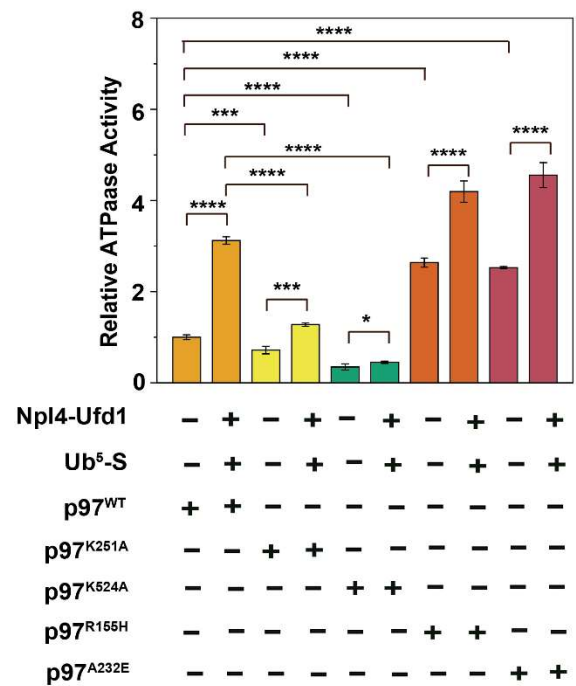

**Supplementary Fig. 7 | Substrate-dependent stimulation of p97 ATPase activity in presence of UN complex.** **a** Relative ATPase activity of p97<sup>WT</sup> was assessed under various conditions: with or without the Npl4-Ufd1 cofactors, and in the presence of different ubiquitin substrates. While, Ub<sup>1</sup>-S and UN alone did not affect p97 ATPase activity, the addition of penta-ubiquitin (Ub<sup>5</sup>-S) resulted in a threefold increase. **b** Comparison of ATPase activity across p97 variants (WT, K251A, K524A, R155H, and A232E) with or without Npl4-Ufd1 and Ub<sup>5</sup>-S. Measurements were performed using BIOMOL Green and normalized to basal p97<sup>WT</sup> activity. The D1 mutant, K251A showed a 29% reduction, and the D2 mutant K524A a 65% reduction in basal activity compared to WT. Addition of Npl4-Ufd1 and Ub<sup>5</sup>-S led to a slight recovery in ATPase activity for these mutants. Pathogenic variants R155H and A232E exhibited elevated basal ATPase activity—4 fold and 4.5-fold above WT, respectively—consistent with previous reports. Furthermore, ATPase activity in these mutants increased significantly with the introduction of cofactors and substrate, surpassing that observed in WT and in substrate-free conditions. Data are presented as mean  $\pm$  SD (n = 3). Statistical significance was determined using a two-tailed Student's t-test (ns, not significant;  $0.05 < p \leq 0.5$ ;  $*0.01 < p \leq 0.05$ ;  $**0.001 < p \leq 0.01$ ;  $***0.0001 < p \leq 0.001$ ;  $****p \leq 0.0001$ ).

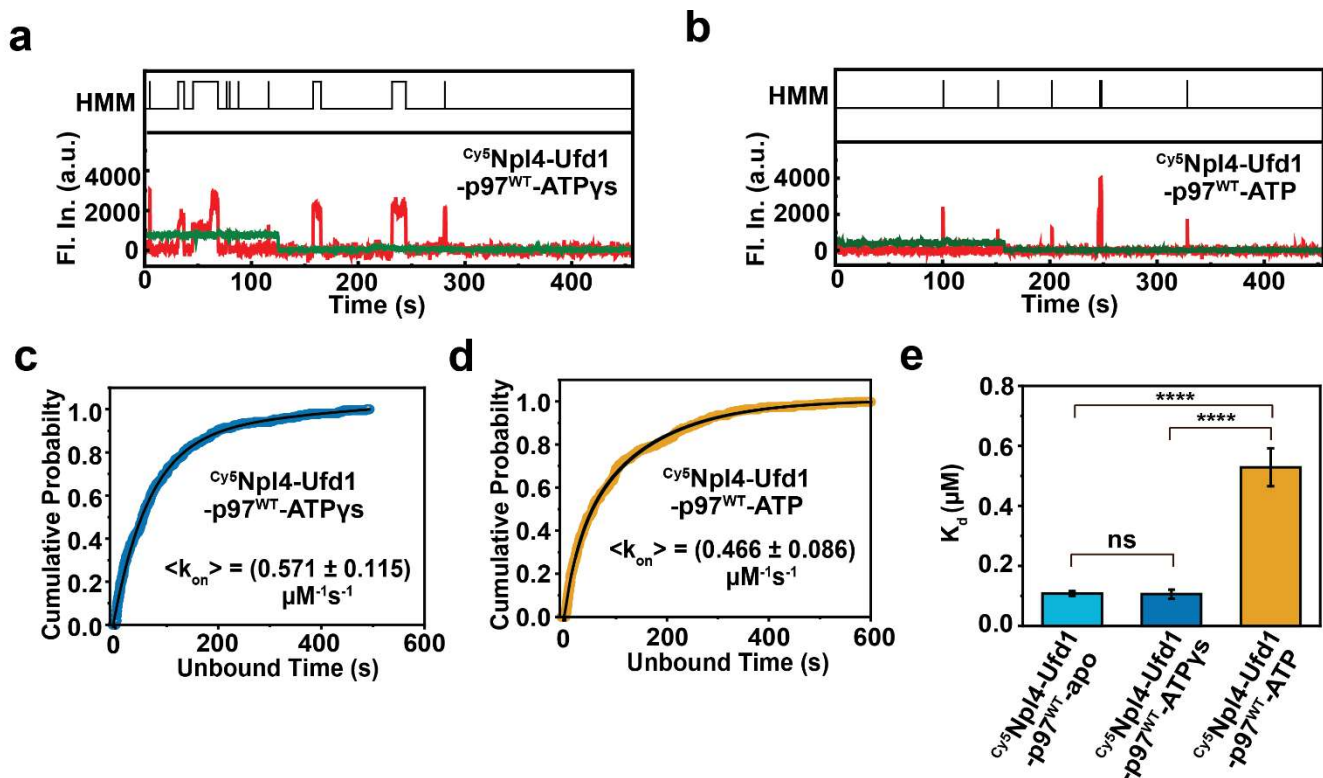

**Supplementary Fig. 8 | Dynamic exchange of Npl4 within the Npl4–Ufd1–p97<sup>WT</sup>–Ub<sup>5</sup>-S complex is modulated by p97 conformational changes under distinct nucleotide states.** **a–b** Representative single-molecule fluorescence intensity trajectories for Cy5-labelled Npl4 (<sup>Cy5</sup>Npl4) (preassembled with Npl4–Ufd1–p97<sup>WT</sup>) bound to Ub<sup>5</sup>-S substrate, under ATPγS (**a**) and ATP (**b**) conditions, illustrating nucleotide-dependent alterations in Npl4 binding dynamics. HMM-derived segmentations are displayed above each trace. **c–d** Cumulative distributions of unbound dwell times for <sup>Cy5</sup>Npl4 (preassembled with Npl4–Ufd1–p97<sup>WT</sup>) on Ub<sup>5</sup>-S substrate under ATPγS (**c**) and ATP (**d**) conditions, highlighting unaltered in association rate constants related to nucleotide state. **e** Quantification of equilibrium dissociation constant ( $K_d$ ) for <sup>Cy5</sup>Npl4 binding to Ub<sup>5</sup>-S across the two nucleotide states. Statistical significance was evaluated by two-tailed Student’s t-test (ns, not significant;  $0.05 < p \leq 0.5$ ;  $*0.01 < p \leq 0.05$ ;  $**0.001 < p \leq 0.01$ ;  $***0.0001 < p \leq 0.001$ ;  $****p \leq 0.0001$ ). Related to Figure 4.

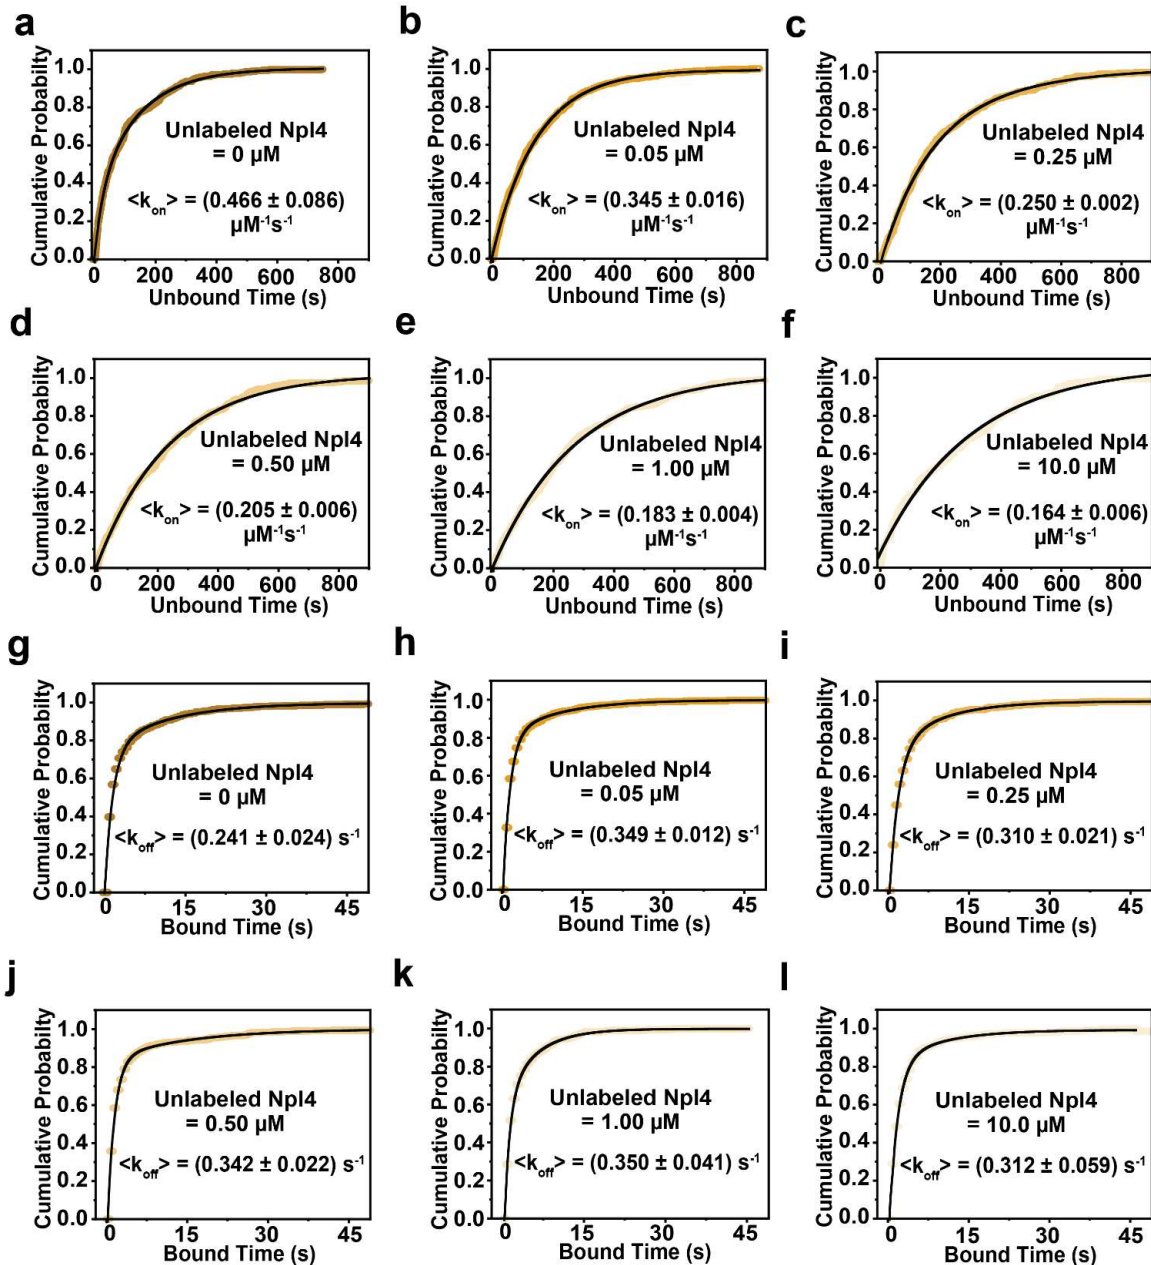

**Supplementary Fig. 9 | Conformational changes in p97 during ATP hydrolysis modulate dynamic Npl4 exchange within the Npl4–Ufd1–p97<sup>WT</sup>–Ub<sup>5</sup>-S complex.** **a–f** Cumulative distributions of unbound dwell times for Cy5-labeled Npl4 (<sup>Cy5</sup>Npl4), preassembled with the Npl4–Ufd1–p97<sup>WT</sup> complex, on Ub<sup>5</sup>-S substrate under ATP hydrolysis conditions, with increasing concentrations of unlabeled Npl4 ([unlabeled Npl4] = 0, 0.05, 0.25, 0.50, 1.0, and 10.0  $\mu\text{M}$ ; <sup>Cy5</sup>Npl4 = 20 nM). The data indicate a stepwise increase in association rate constants as the concentration of unlabeled Npl4 rises, reflecting enhanced Npl4 exchange within the complex during p97 ATP hydrolysis. **g–i** Cumulative distributions of bound dwell times for <sup>Cy5</sup>Npl4 (preassembled with Npl4–Ufd1–p97<sup>WT</sup>) bound to Ub<sup>5</sup>-S substrate under identical ATP hydrolysis conditions and increasing concentrations of unlabeled Npl4, demonstrate that dissociation rate constants remain largely unchanged, regardless of added unlabeled Npl4. Figure 4 for related data.

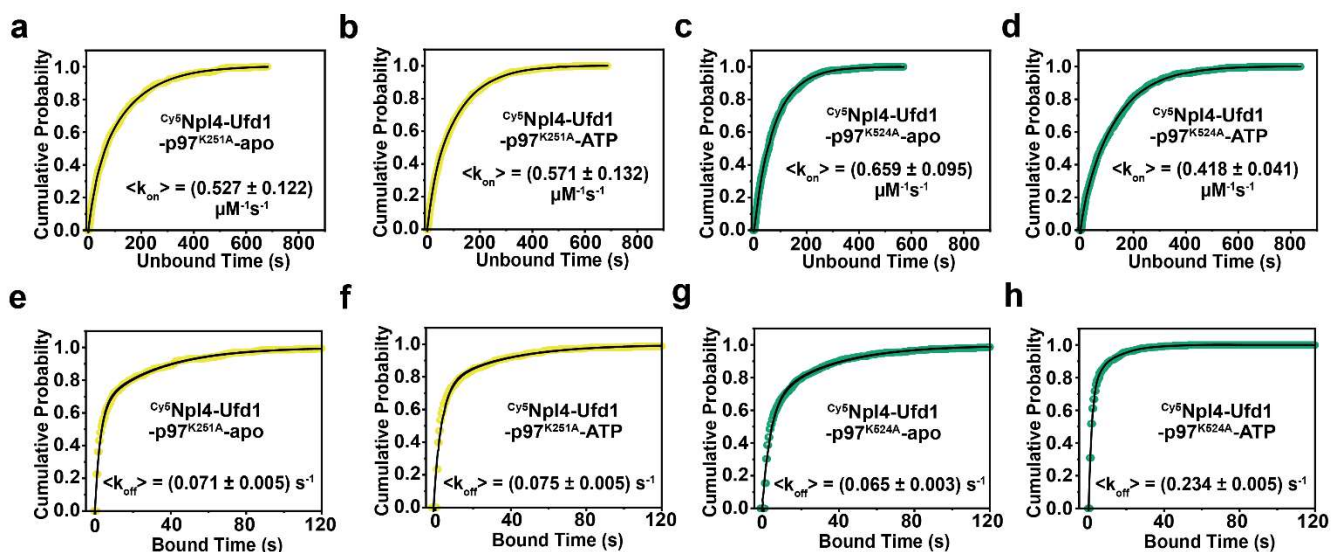

**Supplementary Fig. 10 | D1-specific ATP hydrolysis facilitates dynamic Npl4 exchange on substrate.**

**a-b** Cumulative distributions of unbound dwell times for Cy<sup>5</sup>Npl4, preassembled with the Npl4–Ufd1–p97<sup>K251A</sup> complex (D1 domain inactive, D2 domain active), interacting with Ub<sup>5</sup>-S substrate in the absence (**a**) and presence (**b**) of ATP. **c-d** Cumulative distributions of unbound dwell times for Cy<sup>5</sup>Npl4 preassembled with the Npl4–Ufd1–p97<sup>K524A</sup> complex (D1 domain active, D2 domain inactive) on Ub<sup>5</sup>-S substrate, without ATP (**c**) and after ATP addition (**d**). **e-f** Cumulative distributions of bound dwell times for Cy<sup>5</sup>Npl4 with the Npl4–Ufd1–p97<sup>K251A</sup> complex on Ub<sup>5</sup>-S, comparing conditions without (**e**) and with (**f**) ATP. **g-h** Cumulative distributions of bound dwell times for Cy<sup>5</sup>Npl4 with the Npl4–Ufd1–p97<sup>K524A</sup> complex on Ub<sup>5</sup>-S substrate, without (**g**) and with (**h**) ATP. See Figure 4 for related results.

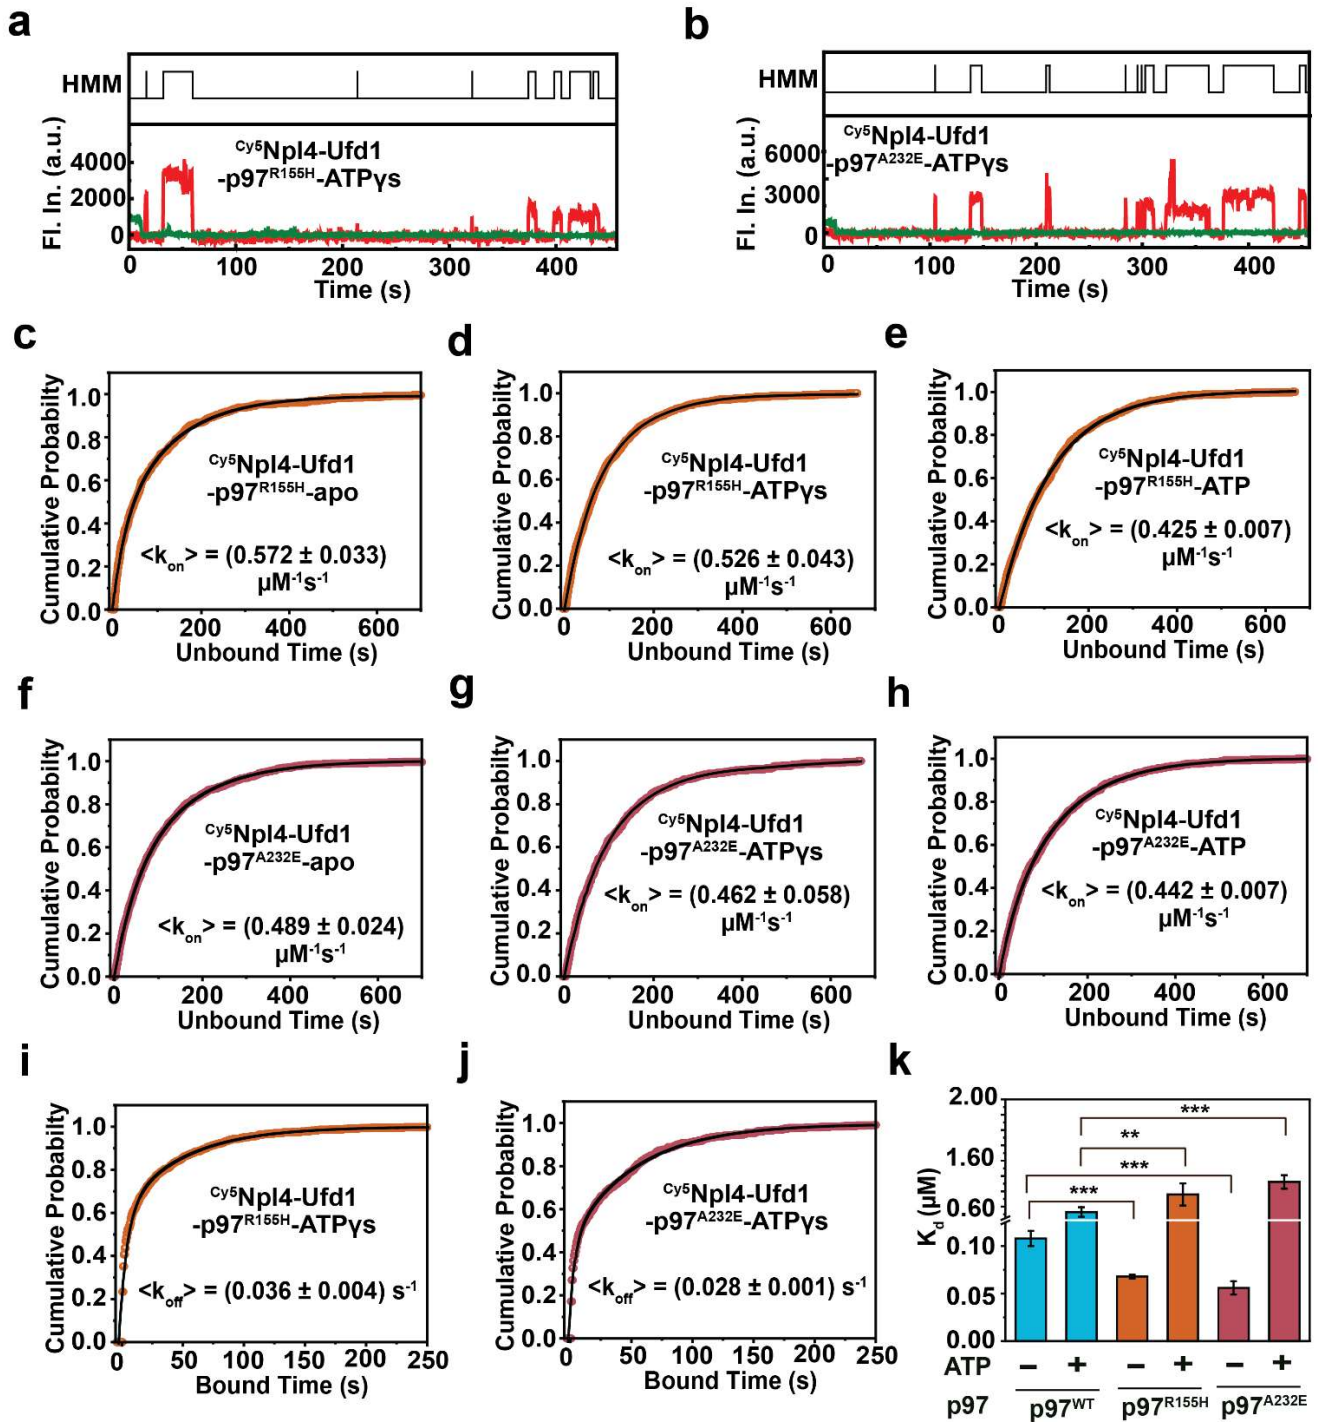

**Supplementary Fig. 11| Disease-associated p97 mutants R155H and A232E enhance substrate affinity and disrupt Npl4-Ufd1-p97 complex dynamics.** a-b Representative single-molecule fluorescence intensity trajectories for Cy<sup>5</sup>Npl4, preassembled with Npl4-Ufd1-p97, binding to Ub<sup>5</sup>-S substrate under ATP<sub>γ</sub>S conditions for the R155H (a) and A232E (b) p97 variants. HMM-segmented regions are indicated above each trace. c-e Cumulative distributions of unbound dwell times for Cy<sup>5</sup>Npl4 (assembled with Npl4-Ufd1-p97<sup>R155H</sup>) binding to Ub<sup>5</sup>-S substrate in the nucleotide-free, apo (c), ATP<sub>γ</sub>S

(d), and ATP (e) conditions, showing minimal changes in association rate constants across nucleotide states. f–h Cumulative distributions of bound dwell times for <sup>Cy5</sup>Npl4 (with Npl4–Ufd1–p97<sup>A232E</sup>) on Ub<sup>5</sup>-S substrate under apo (f), ATPγS (g), and ATP (h) conditions, indicating similar association kinetics regardless of nucleotide state. i Quantification of equilibrium dissociation constant (K<sub>d</sub>) for <sup>Cy5</sup>Npl4 binding to Ub<sup>5</sup>-S across apo and nucleotide conditions for p97<sup>WT</sup> and the pathogenic mutants p97<sup>R155H</sup> and p97<sup>A232E</sup>. Statistical significance determined using two-tailed Student's t-test (ns, not significant; 0.05 < p ≤ 0.5; \*0.01 < p ≤ 0.05; \*\*0.001 < p ≤ 0.01; \*\*\*0.0001 < p ≤ 0.001; \*\*\*\*p ≤ 0.0001). See Figure 5 for related data.

**Table S1: Proteins used in this study**

| Plasmid name                    | Vector  | Antibiotic Resistance | Expression                                        | Purification                          | Comments                                   | Source                                                                            |
|---------------------------------|---------|-----------------------|---------------------------------------------------|---------------------------------------|--------------------------------------------|-----------------------------------------------------------------------------------|
| Ub <sup>1</sup> -SNAP-tag-6xHis | pET-28a | KAN                   | BL21 (DE3),<br>0.6 mM IPTG, TB,<br>18 °C for 14 h | Ni-NTA, His-Trap column               | -                                          | This study                                                                        |
| 6xHis-TEV-gp78-Ube2g2           | pET-28a | KAN                   | BL21 (DE3),<br>0.4 mM IPTG, TB,<br>25 °C for 16 h | Ni-NTA, TEV cleavage, His-Trap column | -                                          | <i>Proc. Natl Acad. Sci. USA</i> <b>114</b> , E4380–E4388 (2017) Ref <sup>2</sup> |
| Npl4                            | pET41b+ | AMP                   | BL21 (DE3),<br>0.4 mM IPTG, TB,<br>18 °C for 14 h | Ni-NTA, His-Trap column               | Co-express and co-purified with Ufd1-8XHis | Addgene                                                                           |
| 6xHis-TEV-Npl4                  | pET-28a | KAN                   | BL21 (DE3),<br>0.4 mM IPTG, TB,<br>18 °C for 14 h | Ni-NTA, TEV cleavage, His-Trap column | -                                          | This study                                                                        |
| Ufd1-8XHis                      | pET41b+ | KAN                   | BL21 (DE3),<br>0.4 mM IPTG, TB,<br>18 °C for 14 h | Ni-NTA, His-Trap column               | -                                          | Addgene                                                                           |
| 6xHis-TEV-Ufd1                  | pET-28a | KAN                   | BL21 (DE3),<br>0.4 mM IPTG, TB,<br>18 °C for 14 h | Ni-NTA, TEV cleavage, His-Trap column | -                                          | This Study                                                                        |
| p97 <sup>WT</sup> -HA-6xHis     | pET-28a | KAN                   | BL21 (DE3),<br>1 mM IPTG, TB, 25 °C for 12 h      | Ni-NTA, His-Trap column               | -                                          | This study                                                                        |

|                                |         |     |                                                    |                             |   |            |
|--------------------------------|---------|-----|----------------------------------------------------|-----------------------------|---|------------|
| p97 <sup>K251A</sup> -HA-6xHis | pET-28a | KAN | BL21 (DE3),<br>1 mM IPTG,<br>TB, 25 °C for<br>12 h | Ni-NTA, His-<br>Trap column | - | This study |
| p97 <sup>K524A</sup> -HA-6xHis | pET-28a | KAN | BL21 (DE3),<br>1 mM IPTG,<br>TB, 25 °C<br>for 12 h | Ni-NTA, His-<br>Trap column | - | This study |
| p97 <sup>R155H</sup> -HA-6xHis | pET-28a | KAN | BL21 (DE3),<br>1 mM IPTG,<br>TB, 25 °C<br>for 12 h | Ni-NTA, His-<br>Trap column | - | This study |
| p97 <sup>A232E</sup> -HA-6xHis | pET-28a | KAN | BL21 (DE3),<br>1 mM IPTG,<br>TB, 25 °C<br>for 12 h | Ni-NTA, His-<br>Trap column | - | This study |

**Table S2: Commercial proteins and chemicals used in this study**

| Protein name                       | Catalog Number# | Source      |
|------------------------------------|-----------------|-------------|
| UBE1                               | UB-0101-005     | LifeSensors |
| Ub                                 | U-100H          | Bio-Techne  |
| <sup>K48R</sup> Ub <sup>1</sup>    | SI217           | LifeSensors |
| <sup>K48R</sup> Ub-Ub <sup>1</sup> | SI4802          | LifeSensors |
| <sup>K48R</sup> Ub-Ub <sup>2</sup> | SI4803          | LifeSensors |
| <sup>K48R</sup> Ub-Ub <sup>3</sup> | SI4804          | LifeSensors |
| Cyanine3 NHS ester                 | 11020           | Lumiprobe   |
| Cyanine5 NHS ester                 | 13020           | Lumiprobe   |
